# Supplementary material for: Low-level jets over the North Sea based on ERA5 and observations: together they do better
Source: Copernicus journal article supplement (doi:10.5194/wes-4-193-2019), 2019-04-03
Supplement: Supplementary file [file wes-4-193-2019-supplement-title-page.pdf › wes-4-193-2019-supplement-title-page.pdf]

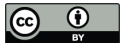

## *Supplement of*

# **Low-level jets over the North Sea based on ERA5 and observations: together they do better**

**Peter C. Kalverla et al.**

*Correspondence to:* Peter C. Kalverla ([peter.kalverla@wur.nl](mailto:peter.kalverla@wur.nl))

- [wes-4-193-2019-supplement-title-page.pdf](#)
- [NSJ-01-Inspect-platform-data-SI.html](#)
- [NSJ-02-Extract-ERA5-platform-data-SI.html](#)
- [NSJ-03-Validate-ERA5-statistics-SI.html](#)
- [NSJ-04-LLJ-Climatology-at-platforms-SI-Revision.html](#)
- [NSJ-05-Machine\\_learning-SI.html](#)
- [NSJ-06-ERA5-spatial-figures-SI.html](#)

The copyright of individual parts of the supplement might differ from the CC BY 4.0 License.
